# Supplementary material for: Homeobox transcription factor OsZHD2 promotes root meristem activity in rice by inducing ethylene biosynthesis
Source: PubMed Central journal article supplement (PMC7501826; doi:10.1093/jxb/eraa209), 2020-05-25
Supplement: eraa209_suppl_supplementary_figures.pdf [file eraa209_suppl_supplementary_figures.pdf]

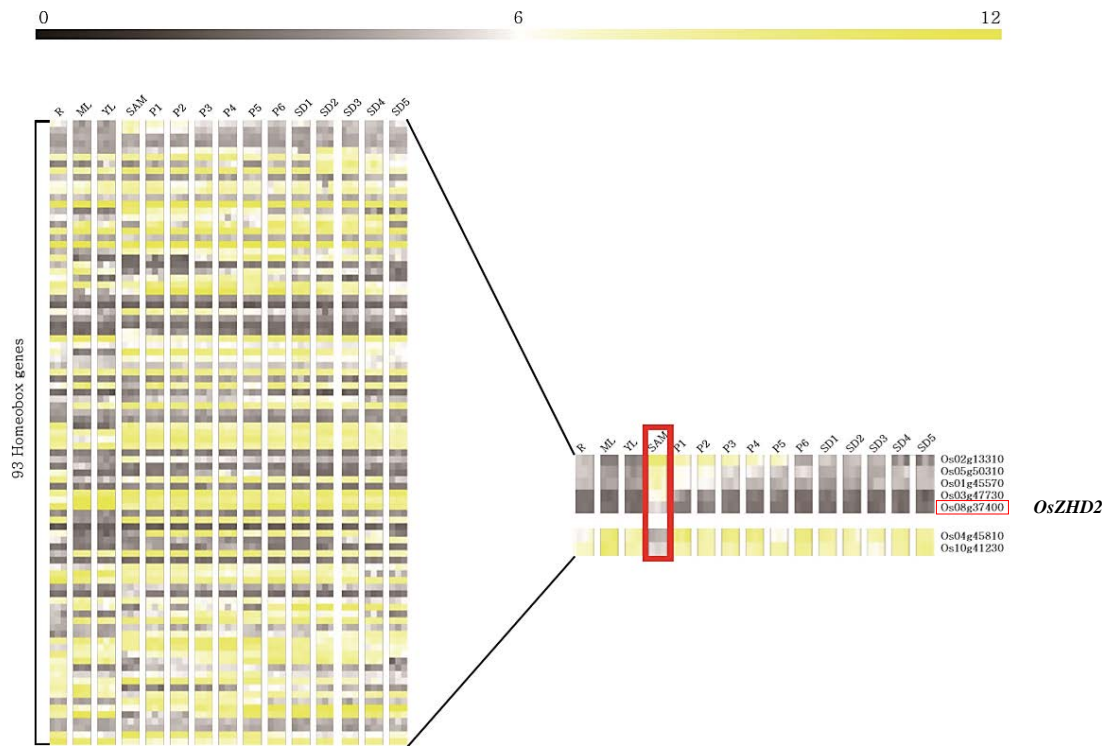

**Supplementary Figure S1.** Expression pattern heatmaps of SAM-preferential homeobox genes. R, root; ML, mature leaf; YL, young leaf; SAM, shoot apical meristem; P1 to P6, developing panicle; SD1 to SD5, developing seeds.

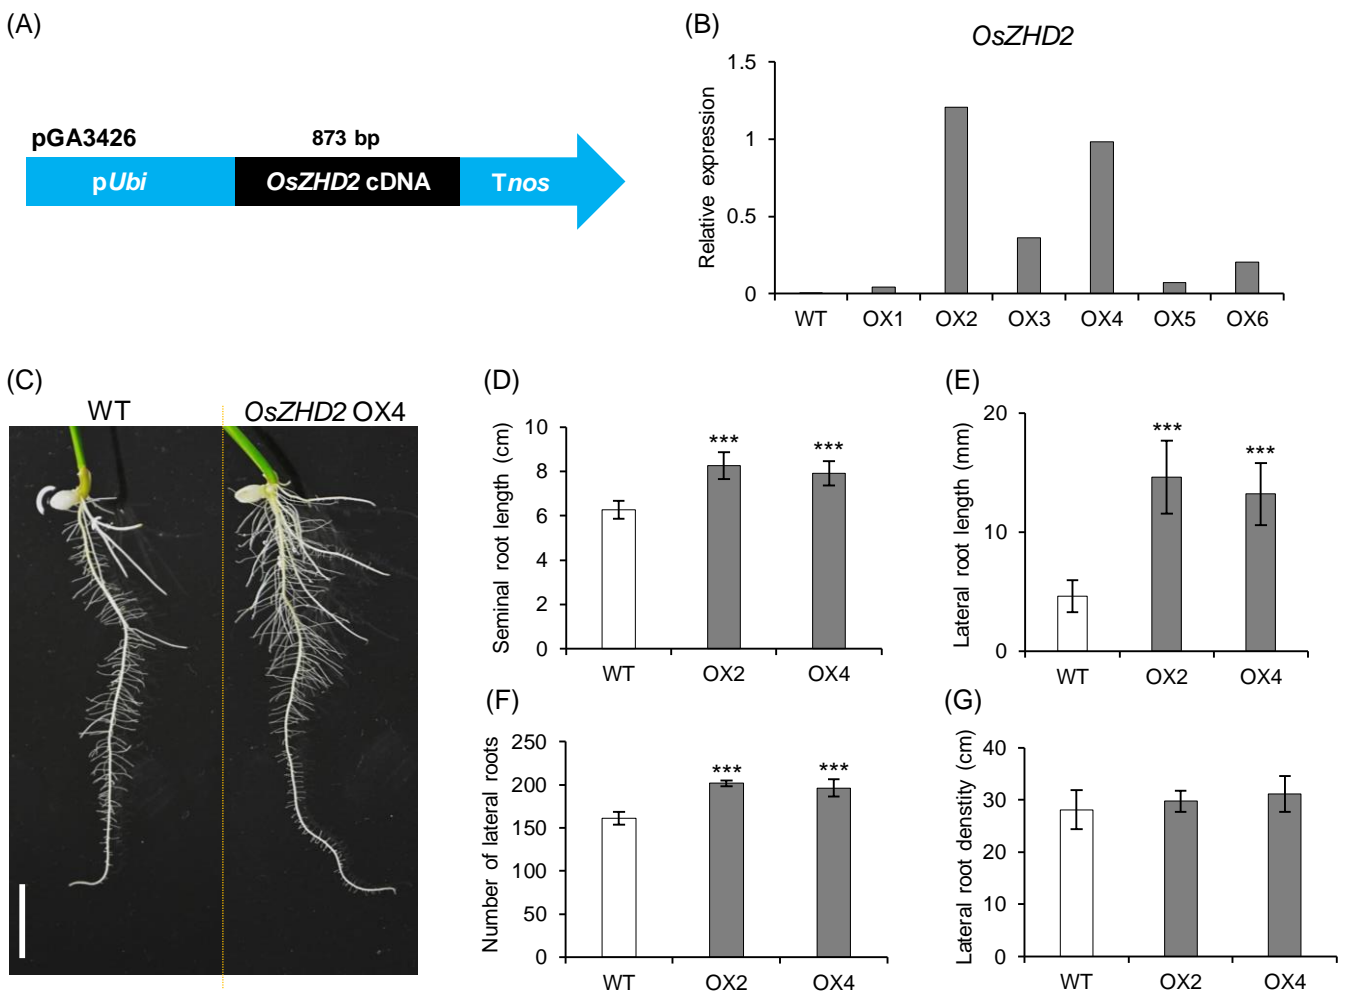

**Supplementary Figure S2.** Characterization of the *OsZHD2* overexpressing plants. (A) Schematic diagram of *OsZHD2*-overexpression construct. The 873-bp full-length *OsZHD2* cDNA was placed between a *Ubi* promoter (*pUbi*) and a *nopaline synthase* terminator (*Tnos*). (B) Expression levels of *OsZHD2* in *OsZHD2*-overexpressing (OX) transgenic plants. RNA samples were collected from leaf blades at the seedling stage. (C) Phenotypes of WT and *OsZHD2* OX plants grown under hydroponic culture conditions at 8 DAG. Bar = 1 cm. (D-G) Root phenotypes of WT and *OsZHD2* OX seedlings at 8 DAG. (D) Seminal root lengths. (E) Lateral root lengths at the top 1-cm region of seminal roots. (F) Total number of lateral roots. (G) Density of lateral roots within the top 1-cm region of seminal roots. Error bars show standard deviations. Statistical significance is indicated by \*\*\* ( $P < 0.001$ ).

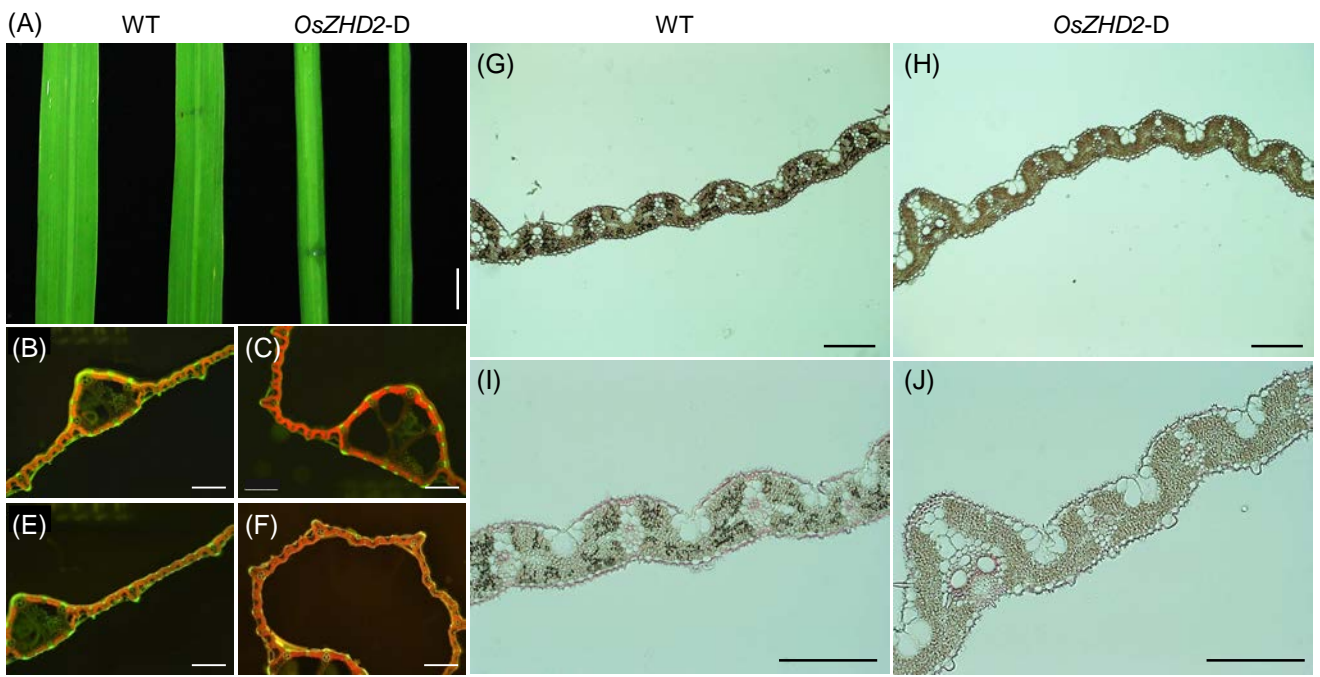

**Supplementary Figure S3.** Characterization of the rolled leaf phenotypes in *OsZHD2-D*. (A) Rolled leaf phenotypes in *OsZHD2-D*. Bar = 5 mm. (B-F) Hand section of WT (B and E) and *OsZHD2-D* (C and F). Bars = 500 μm. (G-J) Cross sectioned samples after paraffin embedding in WT (G and I) and *OsZHD2-D* (H and J). Bars = 200 μm.

(A)

|      |          | LOC_ID       | Function                                                    | 4 days | 6 days |
|------|----------|--------------|-------------------------------------------------------------|--------|--------|
| Up   | 4, 6 DAG | OS02G0252400 | OsDof3, dof zinc finger domain containing protein           | 2.9    | 7.9    |
|      |          | OS06G0142200 | OsENOD93a, early nodulin 93 ENOD93 protein                  | 2.2    | 7.1    |
|      |          | OS06G0552900 | FT-Like12                                                   | 109.9  | 206.9  |
|      |          | OS03G0170900 | OsSUT1, SUCROSE TRANSPORTER 1                               | 5.7    | 5.1    |
|      | 6 DAG    | OS09G0466100 | CYCD4;1                                                     | 1.4    | 2.3    |
|      |          | OS01G0797600 | ERF2                                                        | 0.9    | 3.2    |
| Down | 4, 6 DAG | OS04G0588700 | OsABCC7, ABC transporter superfamily ABCC subgroup member 7 | 0.3    | 0.3    |
|      |          | OS06G0159600 | OsPUB64, U-box protein 64                                   | 0.3    | 0.3    |

## 4 DAG

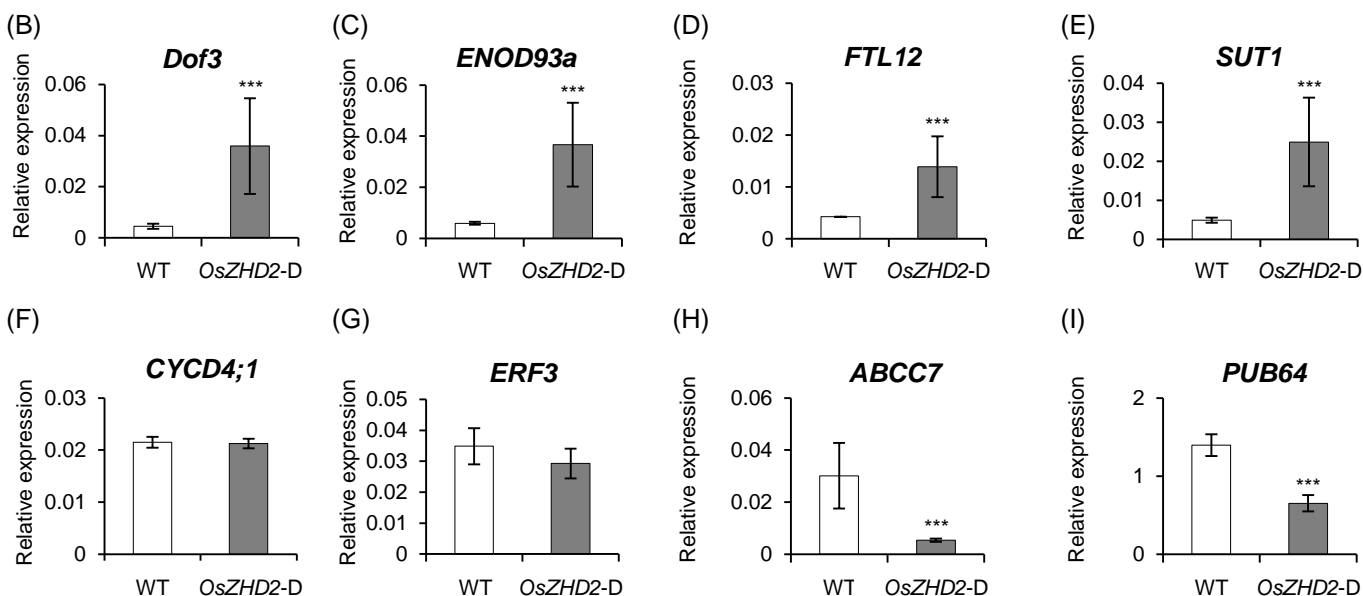

## 6 DAG

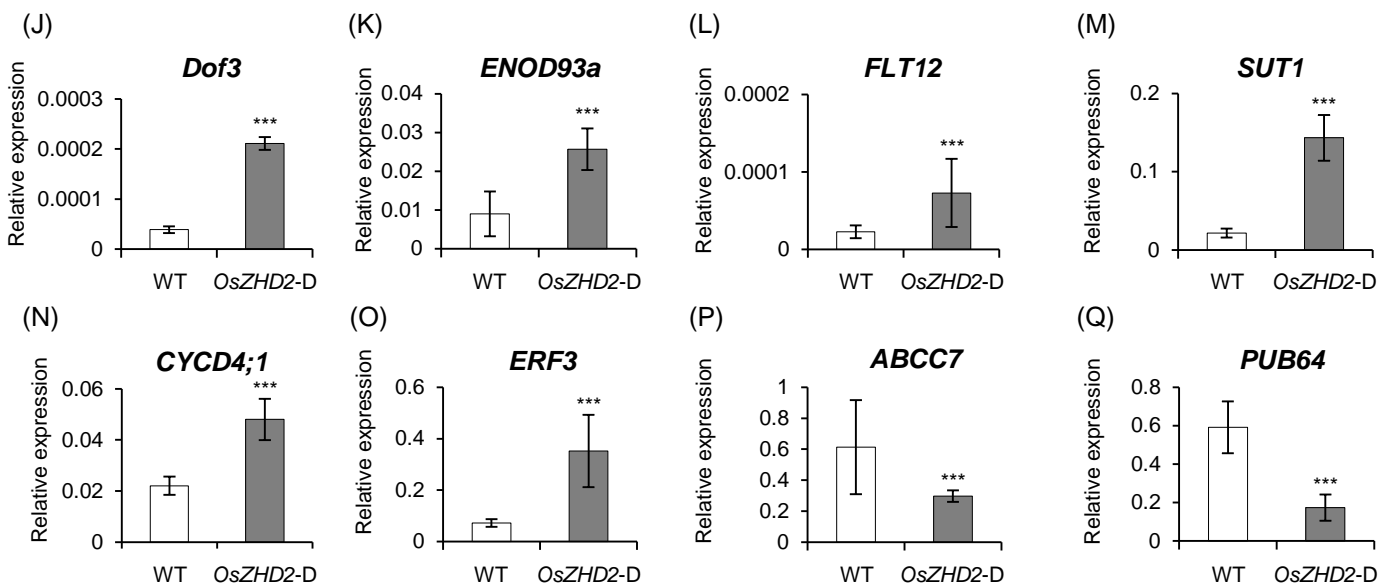

**Supplementary Figure S4.** Validation of RNA-sequencing by qRT-PCR. (A) Genes differentially expressed in *OsZHD2-D*. (B-I) Transcript levels of selected genes at 4 DAG. (J-H) Transcript levels of selected genes at 6 DAG, compared with *Ubi*. Error bars indicate standard deviations.  $n = 4$ .

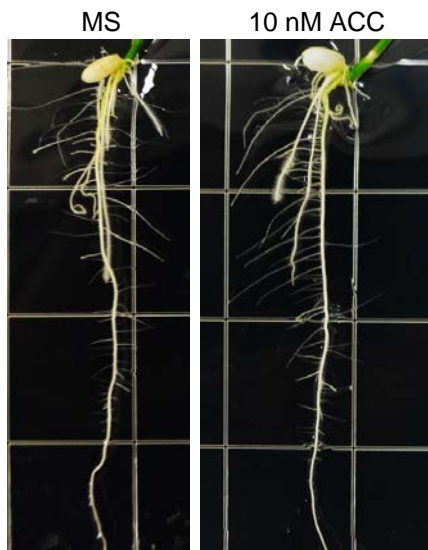

**Supplementary Figure S5.** Phenotype of WT plants after mock (left) and 10 nM ACC (right) treatment.

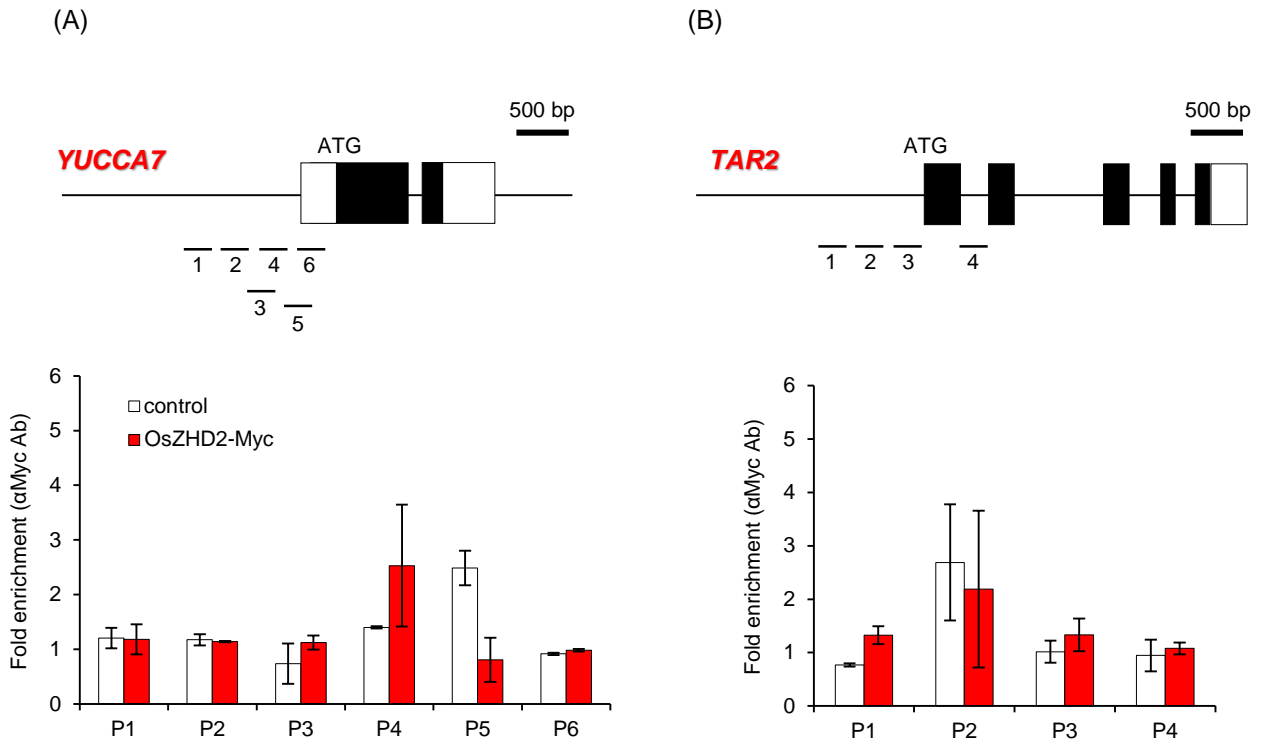

**Supplementary Figure S6.** ChIP assay with OsZHD2-Myc protein. OsZHD2-Myc enrichment in chromatin regions of *YUCCA7* (A) and *TAR2* (B).

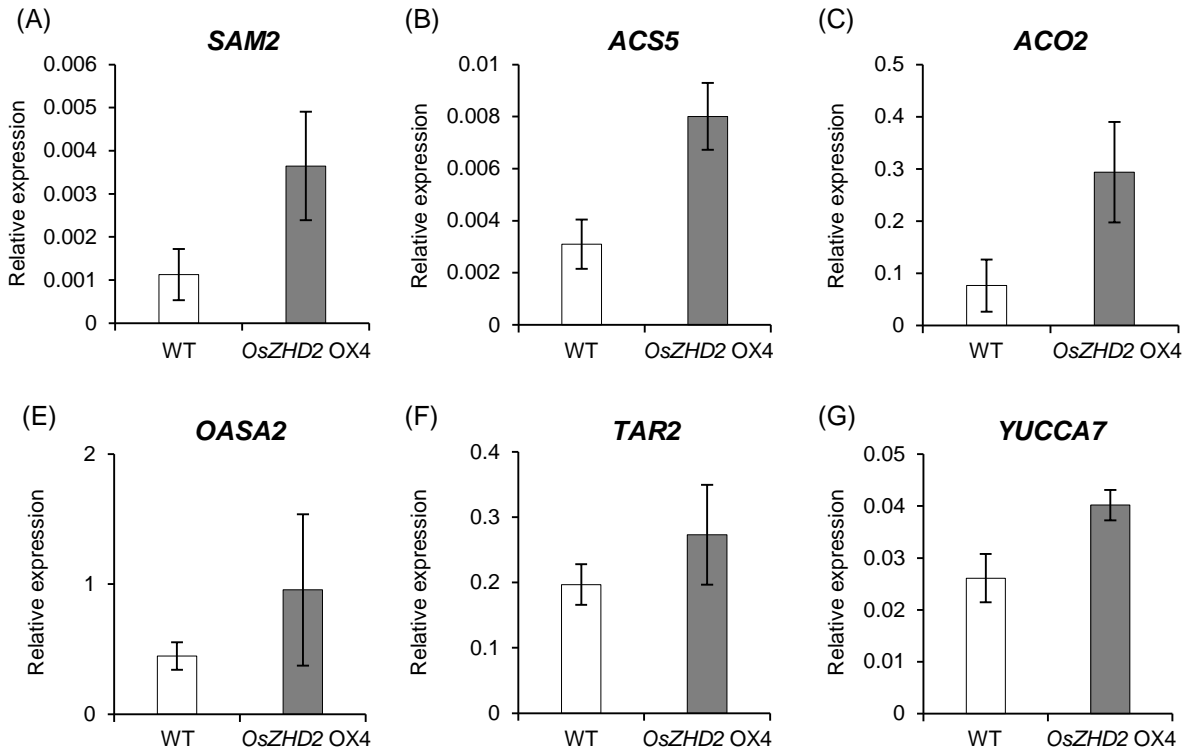

**Supplementary Figure S7.** Expression levels of ethylene biosynthesis genes and auxin biosynthesis genes in roots at 6 DAG. Error bars show standard deviations. n = 4.

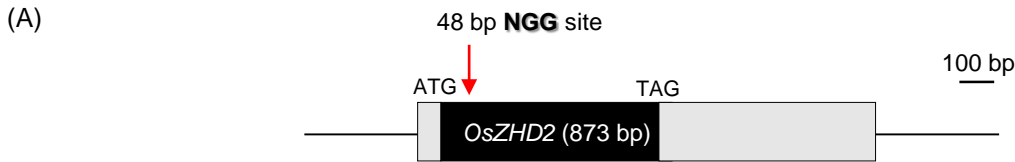

5' **ATG**GATTTTCGACGACCATGACGAGGGTGACGGCGACGAGGAGATGCCT**CCG**ATGCCTCTGAGCTCGGGCTACGACGCGCCG 3'

**oszhd2-1 (CRISPR/Cas line #1)**

ATG**GATTTTCGACGACCATGACGAGGGTGACGGCGACGAGGAGATGCCT**CCG**ATG**TCTCTGAGCTCGGGCTACGACGCGCCG + 1 bp

ATG**GATTTTCGACGACCATGACGAGGGTGACGGCGACGAGGAGATGCCT**CCG**ATG**ACTCTGAGCTCGGGCTACGACGCGCCG + 1 bp

**oszhd2-2 (CRISPR/Cas line #2)**

ATG**GATTTTCGACGACCATGACGAGGGTGACGGCGACGAGGAGATGCCT**CCG**ATG**GCCTCTGAGCTCGGGCTACGACGCGCCG + 1 bp

ATG**GATTTTCGACGACCATGACGAGGGTGACGGCGACGAGGAGATGCCT**CCG**ATG** -CTCTGAGCTCGGGCTACGACGCGCCG - 1 bp

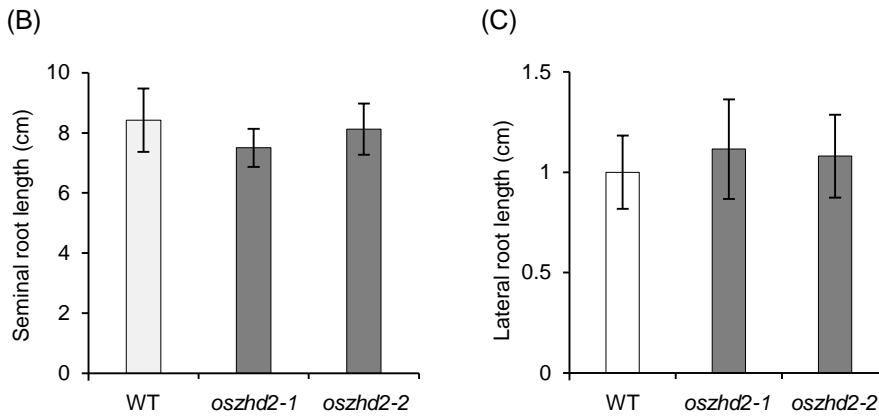

**Supplementary Figure S8.** Generation of *oszhd2* mutants. (A) Schematic diagram of *OsZHD2* and mutation sites generated using the CRISPR/Cas9 system. (B) Seminal root lengths of WT and *oszhd2* mutants at 8 DAG.  $n = 5$ . (C) Lateral root lengths of WT and *oszhd2* mutants at 8 DAG.  $n > 60$ .



(A)

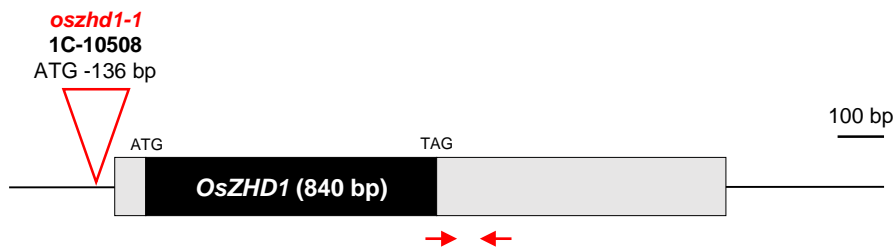

(B)

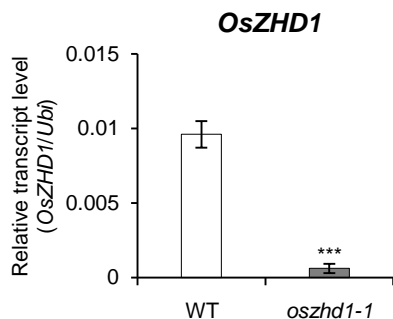

(C)

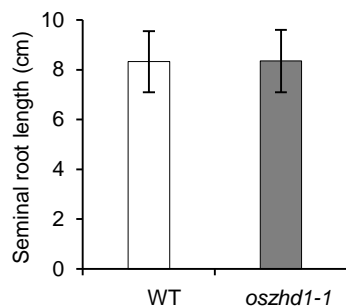

(D)

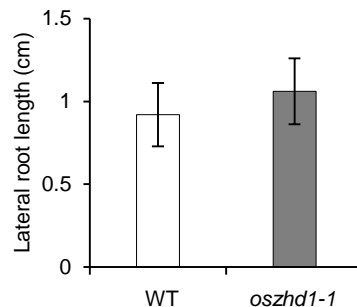

**Supplementary Figure S9.** Analysis of *oszhd1* mutant. (A) Schematic diagram of *OsZHD1* genome and T-DNA insertion site in Line 1C-10508. T-DNA was inserted 136 bp upstream from the ATG start codon. (B) Transcript levels of *OsZHD1* in WT and *oszhd1* plants. RNA samples were collected from leaf blades at the seedling stage. (C) Seminal root lengths of WT and *oszhd1* plants at 8 DAG.  $n = 5$ . (D) Lateral root lengths of WT and *oszhd1-1* plants at 8 DAG.  $n > 60$ .
